# Supplementary material for: Continental-scale drivers of soil microbial extracellular polymeric substances
Source: Research Square preprint supplement (doi:10.21203/rs.3.rs-6279309/v1), 2025-04-09
Supplement: Supplementary file 1 [file 0a1bd56db8d62b552a4e4f44.xlsx]

## Sheet: Sheet1
Table S12 Effects of climate, plant, soil, microbial factors and bedrock type on EPS polysaccharides in terms of P and F values of the general linear model.
Model: EPS polysaccharides ~ Climate/plant/soil/microbial factors * Bedrock type
Type	Variables	Df	F value	P value
Climate	Latitude	1	0.776	0.381
	Bedrock type	2	11.871	0
	Latitude:Bedrock type	2	8.197	0.001
	Longitude	1	0.721	0.398
	Bedrock type	2	15.508	0
	Longitude:Bedrock type	2	4.346	0.016
	Elevation	1	13.345	0
	Bedrock type	2	11.534	0
	Elevation:Bedrock type	2	1.516	0.225
	MAT	1	0.596	0.442
	Bedrock type	2	19.86	0
	MAT:Bedrock type	2	11.667	0
	MAP	1	15.789	0
	Bedrock type	2	15.039	0
	MAP:Bedrock type	2	1.635	0.201
	PET	1	0.621	0.433
	Bedrock type	2	21.264	0
	PET:Bedrock type	2	5.171	0.008
	ADI	1	17.948	0
	Bedrock type	2	24.459	0
	ADI:Bedrock type	2	3.901	0.024
Plant	Root biomass	1	7.382	0.008
	Bedrock type	2	16.69	0
	Root biomass:Bedrock type	2	4.6	0.013
	Root C content	1	0.227	0.635
	Bedrock type	2	10.606	0
	Root C content:Bedrock type	2	0.45	0.639
	Root N content	1	7.111	0.009
	Bedrock type	2	11.163	0
	Root N content:Bedrock type	2	2.493	0.089
	Root P content	1	1.143	0.289
	Bedrock type	2	11.212	0
	Root N content:Bedrock type	2	2.303	0.107
	Root C:N	1	6.582	0.012
	Bedrock type	2	10.417	0
	Root C:N:Bedrock type	2	1.893	0.157
	Root C:P	1	0.685	0.411
	Bedrock type	2	10.93	0
	Root C:P:Bedrock type	2	0.728	0.487
	Root N:P	1	0.242	0.624
	Bedrock type	2	10.518	0
	Root N:P:Bedrock type	2	0.314	0.731
Microbial	MBC	1	117.756	0
	Bedrock type	2	11.463	0
	MBC:Bedrock type	2	1.139	0.325
	MBN	1	122.665	0
	Bedrock type	2	5.645	0.005
	MBN:Bedrock type	2	0.462	0.632
	MBP	1	48.819	0
	Bedrock type	2	6.023	0.004
	MBP:Bedrock type	2	4.167	0.019
	MBC:MBN	1	12.753	0.001
	Bedrock type	2	7.228	0.001
	MBC:MBN:Bedrock type	2	0.648	0.526
	MBC:MBP	1	1.949	0.166
	Bedrock type	2	8.969	0
	MBC:MBP:Bedrock type	2	1.304	0.277
	MBN:MBP	1	0.436	0.511
	Bedrock type	2	9.84	0
	MBN:MBP:Bedrock type	2	0.653	0.523
	CUE	1	1.996	0.161
	Bedrock type	2	9.405	0
	CUE:Bedrock type	2	0.667	0.516
	NUE	1	2.358	0.128
	Bedrock type	2	8.529	0
	NUE:Bedrock type	2	0.265	0.768
	Cgrowth	1	9.875	0.002
	Bedrock type	2	13.341	0
	Cgrowth:Bedrock type	2	5.29	0.007
	qGrowth	1	4.134	0.045
	Bedrock type	2	8.923	0
	qGrowth:Bedrock type	2	0.754	0.474
	Turnover time	1	2.349	0.129
	Bedrock type	2	10.121	0
	Turnover time:Bedrock type	2	1.7	0.189
	VectorL	1	1.621	0.206
	Bedrock type	2	9.045	0
	VectorL:Bedrock type	2	0.89	0.414
	VectorA	1	2.602	0.11
	Bedrock type	2	8.893	0
	VectorA:Bedrock type	2	0.418	0.66
	GPB	1	2.541	0.115
	Bedrock type	2	10.337	0
	GPB:Bedrock type	2	0.547	0.581
	GNB	1	3.922	0.051
	Bedrock type	2	10.33	0
	GNB:Bedrock type	2	0.522	0.595
	Fungi	1	2.168	0.145
	Bedrock type	2	9.737	0
	Fungi:Bedrock type	2	0.252	0.778
	Bacteria	1	2.527	0.116
	Bedrock type	2	10.182	0
	Bacteria:Bedrock type	2	0.572	0.567
	Total PLFA	1	1.466	0.229
	Bedrock type	2	10.58	0
	Total PLFA:Bedrock type	2	1.963	0.147
	B:F	1	0.053	0.819
	Bedrock type	2	9.868	0
	B:F:Bedrock type	2	0.794	0.455
	GPB:GNB	1	0.009	0.924
	Bedrock type	2	10.148	0
	GPB:GNB:Bedrock type	2	1.351	0.264
	BG	1	0.478	0.491
	Bedrock type	2	12.047	0
	BG:Bedrock type	2	4.187	0.018
	NAG	1	2.418	0.124
	Bedrock type	2	9.374	0
	NAG:Bedrock type	2	2.695	0.073
	LAP	1	0.397	0.531
	Bedrock type	2	12.477	0
	LAP:Bedrock type	2	1.89	0.157
	AP	1	7.133	0.009
	Bedrock type	2	11.159	0
	AP:Bedrock type	2	9.623	0
	CEL	1	2.981	0.088
	Bedrock type	2	8.541	0
	CEL:Bedrock type	2	0.505	0.605
	BX	1	0.878	0.351
	Bedrock type	2	12.06	0
	BX:Bedrock type	2	9.684	0
	POX	1	0.772	0.382
	Bedrock type	2	11.333	0
	POX:Bedrock type	2	2.086	0.13
Soil	SOC	1	67.621	0
	Bedrock type	2	18.899	0
	SOC:Bedrock type	2	1.079	0.345
	TN	1	118.865	0
	Bedrock type	2	13.059	0
	TN:Bedrock type	2	0.459	0.634
	TP	1	23.727	0
	Bedrock type	2	12.389	0
	TP:Bedrock type	2	4.844	0.01
	C:N	1	2.929	0.091
	Bedrock type	2	8.908	0
	C:N:Bedrock type	2	0.048	0.953
	C:P	1	1.563	0.215
	Bedrock type	2	10.558	0
	C:P:Bedrock type	2	0.764	0.469
	N:P	1	4.761	0.032
	Bedrock type	2	10.261	0
	N:P:Bedrock type	2	1.927	0.152
	NH4+	1	0.018	0.893
	Bedrock type	2	10.832	0
	NH4+:Bedrock type	2	1.997	0.142
	NO3-	1	8.281	0.005
	Bedrock type	2	11.194	0
	NO3-:Bedrock type	2	4.007	0.022
	TDN	1	14.318	0
	Bedrock type	2	9.947	0
	TDN:Bedrock type	2	0.923	0.401
	DOC	1	1.339	0.25
	Bedrock type	2	9.9	0
	DOC:Bedrock type	2	4.017	0.021
	TOP	1	40.43	0
	Bedrock type	2	14.301	0
	TOP:Bedrock type	2	1.692	0.19
	WHC	1	73.728	0
	Bedrock type	2	11.668	0
	WHC:Bedrock type	2	0.422	0.657
	CEC	1	107.429	0
	Bedrock type	2	3.254	0.043
	CEC:Bedrock type	2	1.371	0.259
	SMC	1	13.484	0
	Bedrock type	2	18.658	0
	SMC:Bedrock type	2	4.336	0.016
	Sand content	1	16.586	0
	Bedrock type	2	6.949	0.002
	Sand content:Bedrock type	2	2.855	0.063
	Silt content	1	6.578	0.012
	Bedrock type	2	9.273	0
	Silt content:Bedrock type	2	3.512	0.034
	Clay content	1	22.162	0
	Bedrock type	2	4.724	0.011
	Clay content:Bedrock type	2	0.19	0.828
	Cae	1	79.717	0
	Bedrock type	2	2.965	0.057
	Cae:Bedrock type	2	1.151	0.321
	Mge	1	10.76	0.001
	Bedrock type	2	8.237	0.001
	Mge:Bedrock type	2	1.884	0.158
	Fed	1	32.001	0
	Bedrock type	2	8.712	0
	Fed:Bedrock type	2	3.832	0.025
	Fec	1	27.102	0
	Bedrock type	2	4.847	0.01
	Fec:Bedrock type	2	4.709	0.011
	Alo	1	0.728	0.396
	Bedrock type	2	11.825	0
	Alo:Bedrock type	2	5.288	0.007
	Feo	1	2.836	0.096
	Bedrock type	2	21.25	0
	Feo:Bedrock type	2	2.538	0.085
	Ald	1	3.71	0.057
	Bedrock type	2	14.73	0
	Ald:Bedrock type	2	3.879	0.024
