# Supplementary material for: Continental-scale drivers of soil microbial extracellular polymeric substances
Source: Research Square preprint supplement (doi:10.21203/rs.3.rs-6279309/v1), 2025-04-09
Supplement: Supplementary file 2 [file 26f1d87bb6cf352a4cbacabe.xlsx]

## Sheet: Sheet1
Table S5 Effects of climatic, plant, soil, and microbial factors on EPS proteins in terms of P and F values of the general linear model.
Model: EPS proteins ~ Climate/plant/soil/microbial factors
Type	Variables	Df	F value	P value
Climate	Latitude	1	0.578	0.449
	Longitude	1	4.679	0.033
	Elevation	1	1.599	0.209
	MAT	1	2.446	0.121
	MAP	1	5.142	0.026
	PET	1	6.198	0.015
	ADI	1	7.157	0.009
Plant	Root biomass	1	9.249	0.003
	Root C content	1	5.475	0.022
	Root N content	1	19.826	0
	Root P content	1	1.587	0.212
	Root C:N	1	14.653	0
	Root C:P	1	2.954	0.09
	Root N:P	1	0.191	0.663
Microbial	MBC	1	47.104	0
	MBN	1	40.997	0
	MBP	1	10.275	0.002
	MBC:MBN	1	8.987	0.004
	MBC:MBP	1	0.069	0.794
	MBN:MBP	1	0.986	0.323
	CUE	1	0.016	0.901
	NUE	1	3.156	0.079
	Cgrowth	1	2.66	0.106
	qGrowth	1	6.408	0.013
	Turnover time	1	5.848	0.018
	VectorL	1	4.394	0.039
	VectorA	1	1.581	0.212
	GPB	1	2.7	0.104
	GNB	1	3.101	0.082
	Fungi	1	1.122	0.292
	Bacteria	1	2.64	0.108
	Total PLFA	1	2.175	0.144
	B:F	1	0.681	0.411
	GPB:GNB	1	0	0.999
	BG	1	0.048	0.827
	NAG	1	0.024	0.877
	LAP	1	0.277	0.6
	AP	1	1.571	0.213
	CEL	1	1.562	0.215
	BX	1	0.112	0.738
	POX	1	0.356	0.552
Soil	SOC	1	13.009	0.001
	TN	1	50.681	0
	TP	1	25.438	0
	C:N	1	8.347	0.005
	C:P	1	1.506	0.223
	N:P	1	0.006	0.936
	NH4+	1	2.658	0.107
	NO3-	1	17.487	0
	TDN	1	20.311	0
	DOC	1	0.969	0.328
	TOP	1	34.237	0
	WHC	1	31.966	0
	CEC	1	10.758	0.001
	SMC	1	5.482	0.021
	Sand content	1	6.859	0.01
	Silt content	1	6.353	0.013
	Clay content	1	2.879	0.093
	Cae	1	10.073	0.002
	Mge	1	4.095	0.046
	Fed	1	8.314	0.005
	Fec	1	2.59	0.111
	Alo	1	2.923	0.091
	Feo	1	13.572	0
	Ald	1	4.918	0.029
