# Supplementary material for: Continental-scale drivers of soil microbial extracellular polymeric substances
Source: Research Square preprint supplement (doi:10.21203/rs.3.rs-6279309/v1), 2025-04-09
Supplement: Supplementary file 3 [file 431cda3d9f08cf85f0d53c8e.xlsx]

## Sheet: Sheet1
Table S10 Effects of climate, plant, soil, microbial factors and land use type on EPS production efficiency in terms of P and F values of the general linear model.
Model: EPS production efficiency ~ Climate/plant/soil/microbial factors * Land use type
Type	Variables	Df	F value	P value
Climate	Latitude	1	1.435	0.234
	Land use type	2	3.302	0.042
	Latitude:Land use type	2	0.464	0.631
	Longitude	1	4.317	0.041
	Land use type	2	4.997	0.009
	Longitude:Land use type	2	3.33	0.04
	Elevation	1	5.067	0.027
	Land use type	2	2.935	0.058
	Elevation:Land use type	2	0.801	0.452
	MAT	1	1.64	0.204
	Land use type	2	3.258	0.043
	MAT:Land use type	2	1.417	0.248
	MAP	1	9.87	0.002
	Land use type	2	3.531	0.034
	MAP:Land use type	2	2.31	0.105
	PET	1	0.292	0.59
	Land use type	2	3.797	0.026
	PET:Land use type	2	1.343	0.267
	ADI	1	11.468	0.001
	Land use type	2	2.657	0.076
	ADI:Land use type	2	0.995	0.374
Plant	Root biomass	1	4.645	0.034
	Land use type	2	2.306	0.106
	Root biomass:Land use type	2	0.592	0.556
	Root C content	1	0.137	0.712
	Land use type	2	4.229	0.018
	Root C content:Land use type	2	1.006	0.37
	Root N content	1	0.04	0.843
	Land use type	2	4.184	0.019
	Root N content:Land use type	2	0.552	0.578
	Root P content	1	0.413	0.523
	Land use type	2	3.95	0.024
	Root N content:Land use type	2	2.068	0.134
	Root C:N	1	0.35	0.556
	Land use type	2	3.905	0.024
	Root C:N:Land use type	2	0.331	0.719
	Root C:P	1	0.069	0.793
	Land use type	2	3.57	0.033
	Root C:P:Land use type	2	5.831	0.004
	Root N:P	1	0.006	0.941
	Land use type	2	2.946	0.059
	Root N:P:Land use type	2	2.359	0.102
Microbial	MBC	1	14.917	0
	Land use type	2	2.679	0.074
	MBC:Land use type	2	0.465	0.63
	MBN	1	7.558	0.007
	Land use type	2	3.254	0.043
	MBN:Land use type	2	0.598	0.552
	MBP	1	6.128	0.015
	Land use type	2	3.109	0.05
	MBP:Land use type	2	1.996	0.142
	MBC:MBN	1	3.414	0.068
	Land use type	2	3.377	0.039
	MBC:MBN:Land use type	2	0.129	0.879
	MBC:MBP	1	0.154	0.695
	Land use type	2	3.787	0.027
	MBC:MBP:Land use type	2	0.408	0.666
	MBN:MBP	1	1.179	0.281
	Land use type	2	7.075	0.001
	MBN:MBP:Land use type	2	3.717	0.028
	CUE	1	13.139	0
	Land use type	2	2.746	0.07
	CUE:Land use type	2	0.195	0.823
	NUE	1	0.115	0.735
	Land use type	2	4.183	0.018
	NUE:Land use type	2	0.448	0.64
	Cgrowth	1	16.617	0
	Land use type	2	2.01	0.14
	Cgrowth:Land use type	2	0.299	0.742
	qGrowth	1	4.889	0.03
	Land use type	2	3.275	0.043
	qGrowth:Land use type	2	0.124	0.884
	Turnover time	1	1.027	0.314
	Land use type	2	3.661	0.03
	Turnover time:Land use type	2	0.745	0.478
	VectorL	1	4.251	0.042
	Land use type	2	2.111	0.127
	VectorL:Land use type	2	1.04	0.358
	VectorA	1	0.262	0.61
	Land use type	2	3.82	0.026
	VectorA:Land use type	2	1.285	0.282
	GPB	1	0.674	0.414
	Land use type	2	3.62	0.031
	GPB:Land use type	2	1.477	0.234
	GNB	1	0.585	0.446
	Land use type	2	3.638	0.03
	GNB:Land use type	2	1.158	0.319
	Fungi	1	0.004	0.948
	Land use type	2	4.089	0.02
	Fungi:Land use type	2	0.423	0.656
	Bacteria	1	0.444	0.507
	Land use type	2	3.74	0.028
	Bacteria:Land use type	2	1.353	0.264
	Total PLFA	1	0.019	0.89
	Land use type	2	4.175	0.019
	Total PLFA:Land use type	2	1.191	0.309
	B:F	1	0.15	0.699
	Land use type	2	3.805	0.026
	B:F:Land use type	2	0.492	0.613
	GPB:GNB	1	0.32	0.573
	Land use type	2	3.726	0.028
	GPB:GNB:Land use type	2	0.212	0.809
	BG	1	1.105	0.296
	Land use type	2	4.716	0.011
	BG:Land use type	2	0.405	0.668
	NAG	1	2.025	0.158
	Land use type	2	3.857	0.025
	NAG:Land use type	2	0.154	0.858
	LAP	1	0.715	0.4
	Land use type	2	4.283	0.017
	LAP:Land use type	2	0.348	0.707
	AP	1	12.876	0.001
	Land use type	2	2.861	0.063
	AP:Land use type	2	0.585	0.559
	CEL	1	0.62	0.433
	Land use type	2	4.893	0.01
	CEL:Land use type	2	0.152	0.859
	BX	1	5.156	0.026
	Land use type	2	4.486	0.014
	BX:Land use type	2	0.443	0.643
	POX	1	3.565	0.062
	Land use type	2	3.166	0.047
	POX:Land use type	2	2.539	0.085
Soil	SOC	1	12.165	0.001
	Land use type	2	1.542	0.22
	SOC:Land use type	2	0.176	0.839
	TN	1	4.696	0.033
	Land use type	2	3.438	0.037
	TN:Land use type	2	0.671	0.514
	TP	1	0	0.997
	Land use type	2	4.516	0.014
	TP:Land use type	2	0.657	0.521
	C:N	1	6.034	0.016
	Land use type	2	1.692	0.19
	C:N:Land use type	2	2.728	0.071
	C:P	1	5.47	0.022
	Land use type	2	1.642	0.2
	C:P:Land use type	2	0.119	0.888
	N:P	1	1.566	0.214
	Land use type	2	3.053	0.052
	N:P:Land use type	2	0.025	0.975
	NH4+	1	2.081	0.153
	Land use type	2	3.105	0.05
	NH4+:Land use type	2	2.174	0.12
	NO3-	1	0.113	0.738
	Land use type	2	4.037	0.021
	NO3-:Land use type	2	0.621	0.54
	TDN	1	2.141	0.147
	Land use type	2	4.849	0.01
	TDN:Land use type	2	1.515	0.226
	DOC	1	10.681	0.002
	Land use type	2	1.767	0.177
	DOC:Land use type	2	1.376	0.258
	TOP	1	0.88	0.351
	Land use type	2	4.355	0.016
	TOP:Land use type	2	2.1	0.129
	WHC	1	3.957	0.05
	Land use type	2	3.03	0.054
	WHC:Land use type	2	1.249	0.292
	CEC	1	2.065	0.154
	Land use type	2	3.262	0.043
	CEC:Land use type	2	0.282	0.755
	SMC	1	8.785	0.004
	Land use type	2	2.313	0.105
	SMC:Land use type	2	2.075	0.132
	Sand content	1	8.171	0.005
	Land use type	2	2.081	0.131
	Sand content:Land use type	2	0.2	0.819
	Silt content	1	5.756	0.019
	Land use type	2	2.745	0.07
	Silt content:Land use type	2	0.047	0.955
	Clay content	1	5.787	0.018
	Land use type	2	2.259	0.111
	Clay content:Land use type	2	0.323	0.725
	Cae	1	2.936	0.09
	Land use type	2	2.949	0.058
	Cae:Land use type	2	0.193	0.825
	Mge	1	2.091	0.152
	Land use type	2	3.009	0.055
	Mge:Land use type	2	0.122	0.886
	Fed	1	0.331	0.567
	Land use type	2	3.735	0.028
	Fed:Land use type	2	0.117	0.89
	Fec	1	0.024	0.877
	Land use type	2	3.841	0.025
	Fec:Land use type	2	0.301	0.741
	Alo	1	1.486	0.226
	Land use type	2	3.259	0.043
	Alo:Land use type	2	0.133	0.875
	Feo	1	0.351	0.555
	Land use type	2	3.819	0.026
	Feo:Land use type	2	0.057	0.945
	Ald	1	3.792	0.055
	Land use type	2	2.9	0.06
	Ald:Land use type	2	0.435	0.648
