# Supplementary material for: Continental-scale drivers of soil microbial extracellular polymeric substances
Source: Research Square preprint supplement (doi:10.21203/rs.3.rs-6279309/v1), 2025-04-09
Supplement: Supplementary file 4 [file 46a66b2bda5190f2f3749e3a.docx]

**Continental-scale drivers of soil microbial extracellular polymeric substances**

Ke Shi1, 2, Qing Zheng2, Baorong Wang3, Lisa Noll2, Shasha Zhang2,  Yuntao Hu2, Honghua Ruan1*, Wolfgang Wanek2*

1 Department of Ecology, Co-Innovation Center for Sustainable Forestry in Southern China, Nanjing Forestry University, Nanjing 210037, China

2 Division of Terrestrial Ecosystem Research, Department of Microbiology and Ecosystem Science, Center of Microbiology and Environmental Systems Science, University of Vienna, Djerassiplatz 1, A-1030, Vienna, Austria

3 College of Grassland Agriculture, Northwest A&F University, Yangling, 712100, China

* Corresponding authors:

Honghua Ruan, Ph.D., Email: hhruan@njfu.edu.cn

Wolfgang Wanek, Ph.D., Email: wolfgang.wanek@univie.ac.at

# Supplementary Information

Figures S1 – S6

Tables S1 - S16

# Figures

**Fig. S1** PCA results of soil factors and microbial factors used in the SEM framework. MBN, microbial biomass nitrogen; Cgrowth, microbial growth; qGrowth, microbial growth normalized to microbial biomass carbon; CUE, microbial carbon use efficiency; SOC, soil organic carbon; Cae, exchangeable Ca2+; **Fed**,Fe oxyhydroxides extracted with Na-dithionite.

**Fig. S2** Box plots of EPS proteins to EPS polysaccharides ratio in soils from different bedrock types (A) and land use types (B). * *p* < 0.05, ** *p* < 0.01, *** *p* < 0.001. EPS, extracellular polymeric substances; EPS PN:PS, EPS protein to EPS polysaccharide ratio.

**Fig. S3** Relationships between EPS production efficiencies, soil pH, and qGrowth. EPS, extracellular polymeric substances; qGrowth, growth normalized to microbial biomass carbon.

**Fig. S4** Results of EPS extracted from soils derived from limestone and non-limestone development using the same amount of cation exchange resin. EPS, extracellular polymeric substances; SOC, soil organic carbon.

**Fig. S5** Random forest importance ranking of environmental factors driving **EPS-C**, the contribution of **EPS-C to soil organic carbon**, and **EPS production efficiency**. * *p* < 0.05, ** *p* < 0.01, *** *p* < 0.001. EPS, extracellular polymeric substances; SOC, soil organic carbon; MBC, microbial biomass carbon; CUE, microbial carbon use efficiency; qGrowth, growth normalized to microbial biomass carbon; Cgrowth, microbial growth; BG, β-glucosidase; **Fed**,Fe oxyhydroxides extracted with Na-dithionite; VectorL, enzyme vector length; MBN, microbial biomass nitrogen; Cae, exchangeable Ca2+; SMC, soil moisture content; ADI, aridity index; **Feo**, Fe oxyhydroxides extracted with acid ammonium oxalate.

**Fig. S6** Structural equation modeling (SEM) results based on only PC1 (A) or PC2 (B) of soil or microbial factors. Red lines indicate negative effects and blue lines signify positive effects. Numbers on the paths represent path coefficients (standardized regression coefficients), indicating the strength and direction of the relationships between variables. Bar chart showing the factor loadings of soil and microbial factors on PC1 and PC2. EPS, extracellular polymeric substances; ADI, aridity index; MBN, microbial biomass nitrogen; Cgrowth, microbial growth; qGrowth, microbial growth normalized to microbial biomass carbon; CUE, microbial carbon use efficiency; SOC, soil organic carbon; Cae, exchangeable Ca2+; **Fed**,Fe oxyhydroxides extracted with Na-dithionite.

# Tables

**Abbreviations in the Tables**

EPS, extracellular polymeric substances;

MAT, mean annual temperature;

MAP, mean annual precipitation;

PET, potential evapotranspiration;

ADI, aridity index;

MBC, microbial biomass carbon;

MBN, microbial biomass nitrogen;

MBP, microbial biomass phosphorus;

CUE, carbon use efficiency;

NUE, nitrogen use efficiency;

Cgrowth, microbial growth;

qGrowth, growth normalized to microbial biomass carbon;

VectorL, vector length;

VectorA, vector angle;

GPB, gram-positive bacteria;

GNB, gram-negative bacteria;

PLFA, phospholipid fatty acids;

B:F, bacteria to fungi ratio;

BG, β-glucosidase;

NAG, N-acetyl-β-glucosaminidase;

LAP, leucine aminopeptidase;

AP, acid phosphatase;

CEL, cellobiosidase;

BX, β-xylosidase;

POX, phenoloxidase;

SOC, soil organic carbon;

TN, total nitrogen;

TP, total phosphorus;

NH4+, ammonia nitrogen;

NO3-, nitrate nitrogen;

TDN, total dissolved nitrogen;

DOC, dissolved organic carbon;

TOP, total organic phosphorus;

WHC, water holding capacity;

CEC, cation exchange capacity;

SMC, soil moisture content;

Cae, exchangeable Ca2+;

Mge, exchangeable Mg2+;

**Fed**, Fe oxyhydroxides extracted with Na-dithionite;

Fec, crystalline Fe oxyhydroxides;

**Alo**, Al oxyhydroxides extracted with acid ammonium oxalate;

**Feo**, Fe oxyhydroxides extracted with acid ammonium oxalate;

**Ald**, Al oxyhydroxides extracted with Na-dithionite.

**Table S1** Previously published quantitative data on EPS extracted using the cation exchange resin method. EPS, extracellular polymeric substances.

| Publications | Site | Land use type | EPS polysaccharides (µg g-1) | EPS proteins (µg g-1) |
| --- | --- | --- | --- | --- |
| (Redmile-Gordon et al., 2020) | 1 | Grass-Arable | 340 | 195 |
| 2 | Arable-Arable | 318 | 185 |
| 3 | Fallow-Arable | 236 | 111 |
| 4 | Grass-Fallow | 294 | 157 |
| 5 | Arable-Fallow | 375 | 176 |
| 6 | Fallow-Fallow | 287 | 126 |
| 7 | Grass-Grass | 346 | 213 |
| 8 | Arable-Grass | 435 | 198 |
| 9 | Fallow-Grass | 382 | 191 |
| (Redmile-Gordon et al., 2015) | 10 | Cropland | 466 | 174 |
| (Redmile-Gordon et al., 2014) | 11 | Fallow | 169 | 43 |
| 12 | Grassland | 401 | 163 |
| (Kidinda et al., 2023) | 13 | Forest | 224 | 58 |
| 14 | Cropland | 338 | 201 |
| 15 | Forest | 252 | 49 |
| 16 | Cropland | 445 | 277 |
| 17 | Forest | 276 | 85 |
| 18 | Cropland | 272 | 153 |
| (Wang et al., 2019) | 19 | Forest | 612 | 184 |
| 20 | Cropland | 878 | 163 |
| (Shi et al., 2024) | 21 | Forest | 158 | 79 |

**Table S2** The ANOVA analysis results of EPS variables. EPS, extracellular polymeric substances; C, carbon; SOC, soil organic carbon; MBC, microbial biomass carbon.

| Variables | Items | *Df* | *F* value | *p* value |
| --- | --- | --- | --- | --- |
| EPS | Bedrock type | 2 | 6.69 | 0.002 |
| Land use type | 2 | 2.77 | 0.068 |
| EPS polysaccharides | Bedrock type | 2 | 9.98 | 0.000 |
| Land use type | 2 | 1.06 | 0.351 |
| EPS proteins | Bedrock type | 2 | 0.31 | 0.732 |
| Land use type | 2 | 6.99 | 0.002 |
| EPS-C | Bedrock type | 2 | 5.93 | 0.004 |
| Land use type | 2 | 3.21 | 0.045 |
| EPS-C/SOC | Bedrock type | 2 | 16.46 | 0.000 |
| Land use type | 2 | 14.68 | 0.000 |
| EPS-C/MBC | Bedrock type | 2 | 7.38 | 0.001 |
| Land use type | 2 | 3.96 | 0.023 |

**Tables S3-S14** are provided as an attached Excel file.

**Table S15** Data of some environmental factors in soils developed from different bedrock types. Values are shown as means ± standard errors (n = 27 for carbonate; n=33 for sediment; n=32 for silicate). In each column, different lowercase letters indicate significant differences between stand ages (*p* < 0.05).

| Factors | Bedrock | | |
| --- | --- | --- | --- |
| Carbonate | Sediment | Silicate |
| Ca2+ (g kg-1) | 8.85 ± 0.79 a | 3.31 ± 0.49 b | 1.80 ± 0.37 b |
| Mg2+ (g kg-1) | 0.37 ± 0.04 a | 0.29 ± 0.04 ab | 0.22 ± 0.04 b |
| pH | 7.90 ± 0.22 a | 5.97 ± 0.20 b | 5.26 ± 0.13 c |
| CEC (cmol kg-1) | 24.40 ± 1.97 a | 11.30 ± 1.28 b | 8.24 ± 0.95 b |
| Clay (%) | 24.37 ± 1.87 a | 15.93 ± 1.63 b | 10.88 ± 1.73 b |
| Silt (%) | 44.91 ± 2.83 a | 41.04 ± 3.24 ab | 34.20 ± 3.04 b |
| Fed (mg g-1) | 11.89 ± 1.60 a | 8.23 ± 0.87 a | 10.63 ± 1.17 a |
| NH4+ (µg N g-1) | 1.63 ± 0.56 a | 3.14 ± 0.59 a | 2.90 ± 0.50 a |
| NO3- (µg N g-1) | 9.60 ± 1.98 a | 10.23 ± 1.37 a | 7.11 ± 1.50 a |

**Table S16** Data of some environmental factors in soils under different land use types. Values are shown as means ± standard errors (n = 24 for cropland; n=27 for grassland; n=41 for woodland). In each column, different lowercase letters indicate significant differences between stand ages (*p* < 0.05).

| Factors | Land use | | |
| --- | --- | --- | --- |
| Cropland | Grassland | Woodland |
| FRB (g) | 0.86 ± 0.29 b | 3.57 ± 0.77 a | 4.00 ± 0.42 a |
| MBC (µg g-1) | 599.51 ± 68.25 a | 1025.60 ± 108.04 ab | 921.70 ± 97.77 b |
| pH | 7.04 ± 0.26 a | 6.53 ± 0.26 a | 5.69 ± 0.23 b |
| SOC (g kg-1) | 19.08 ± 1.94 a | 29.62 ± 3.95 ab | 38.51 ± 4.05 b |
