# Supplementary material for: Continental-scale drivers of soil microbial extracellular polymeric substances
Source: Research Square preprint supplement (doi:10.21203/rs.3.rs-6279309/v1), 2025-04-09
Supplement: Supplementary file 5 [file 53cbab8245c99043f9d9a9b2.xlsx]

## Sheet: Sheet1
Table S14 Effects of climate, plant, soil, microbial factors and bedrock type on EPS production efficiency in terms of P and F values of the general linear model.
Model: EPS/MBC ~ Climate/plant/soil/microbial factors * Bedrock type
Type	Variables	Df	F value	P value
Climate	Latitude	1	1.555	0.216
	Bedrock type	2	7.414	0.001
	Latitude:Bedrock type	2	0.268	0.765
	Longitude	1	4.507	0.037
	Bedrock type	2	9.718	0
	Longitude:Bedrock type	2	0.87	0.423
	Elevation	1	5.321	0.023
	Bedrock type	2	5.853	0.004
	Elevation:Bedrock type	2	0.227	0.798
	MAT	1	1.726	0.192
	Bedrock type	2	6.911	0.002
	MAT:Bedrock type	2	0.251	0.778
	MAP	1	9.579	0.003
	Bedrock type	2	4.374	0.016
	MAP:Bedrock type	2	0.028	0.972
	PET	1	0.311	0.578
	Bedrock type	2	8.24	0.001
	PET:Bedrock type	2	0.062	0.94
	ADI	1	11.347	0.001
	Bedrock type	2	3.085	0.051
	ADI:Bedrock type	2	0.072	0.93
Plant	Root biomass	1	4.937	0.029
	Bedrock type	2	5.325	0.007
	Root biomass:Bedrock type	2	0.462	0.632
	Root C content	1	0.147	0.702
	Bedrock type	2	7.2	0.001
	Root C content:Bedrock type	2	1.602	0.208
	Root N content	1	0.043	0.836
	Bedrock type	2	6.862	0.002
	Root N content:Bedrock type	2	2.076	0.132
	Root P content	1	0.4	0.529
	Bedrock type	2	4.355	0.016
	Root N content:Bedrock type	2	0.39	0.679
	Root C:N	1	0.398	0.53
	Bedrock type	2	6.94	0.002
	Root C:N:Bedrock type	2	3.556	0.033
	Root C:P	1	0.063	0.802
	Bedrock type	2	4.664	0.012
	Root C:P:Bedrock type	2	0.638	0.531
	Root N:P	1	0.005	0.942
	Bedrock type	2	4.117	0.02
	Root N:P:Bedrock type	2	0.114	0.893
Microbial	MBC	1	15.95	0
	Bedrock type	2	5.456	0.006
	MBC:Bedrock type	2	0.885	0.416
	MBN	1	8.054	0.006
	Bedrock type	2	6.598	0.002
	MBN:Bedrock type	2	0.329	0.721
	MBP	1	6.601	0.012
	Bedrock type	2	8.309	0.001
	MBP:Bedrock type	2	0.507	0.604
	MBC:MBN	1	3.91	0.051
	Bedrock type	2	7.316	0.001
	MBC:MBN:Bedrock type	2	2.941	0.058
	MBC:MBP	1	0.169	0.682
	Bedrock type	2	8.568	0
	MBC:MBP:Bedrock type	2	0.058	0.944
	MBN:MBP	1	1.208	0.275
	Bedrock type	2	9.179	0
	MBN:MBP:Bedrock type	2	0.382	0.684
	CUE	1	13.595	0
	Bedrock type	2	4.51	0.014
	CUE:Bedrock type	2	0.024	0.976
	NUE	1	0.124	0.726
	Bedrock type	2	7.463	0.001
	NUE:Bedrock type	2	0.858	0.428
	Cgrowth	1	17.34	0
	Bedrock type	2	3.973	0.022
	Cgrowth:Bedrock type	2	0.308	0.736
	qGrowth	1	5.169	0.025
	Bedrock type	2	6.009	0.004
	qGrowth:Bedrock type	2	0.039	0.962
	Turnover time	1	1.097	0.298
	Bedrock type	2	6.993	0.002
	Turnover time:Bedrock type	2	0.657	0.521
	VectorL	1	4.912	0.029
	Bedrock type	2	6.811	0.002
	VectorL:Bedrock type	2	3.513	0.034
	VectorA	1	0.28	0.598
	Bedrock type	2	7.198	0.001
	VectorA:Bedrock type	2	1.172	0.315
	GPB	1	0.712	0.401
	Bedrock type	2	6.94	0.002
	GPB:Bedrock type	2	0.841	0.435
	GNB	1	0.615	0.435
	Bedrock type	2	6.889	0.002
	GNB:Bedrock type	2	0.349	0.706
	Fungi	1	0.005	0.946
	Bedrock type	2	7.23	0.001
	Fungi:Bedrock type	2	0.633	0.534
	Bacteria	1	0.468	0.496
	Bedrock type	2	7.008	0.002
	Bacteria:Bedrock type	2	0.655	0.522
	Total PLFA	1	0.02	0.887
	Bedrock type	2	7.246	0.001
	Total PLFA:Bedrock type	2	0.466	0.629
	B:F	1	0.162	0.688
	Bedrock type	2	7.181	0.001
	B:F:Bedrock type	2	0.745	0.478
	GPB:GNB	1	0.356	0.552
	Bedrock type	2	7.433	0.001
	GPB:GNB:Bedrock type	2	1.738	0.182
	BG	1	1.203	0.276
	Bedrock type	2	8.323	0
	BG:Bedrock type	2	1.079	0.345
	NAG	1	2.264	0.136
	Bedrock type	2	8.751	0
	NAG:Bedrock type	2	0.795	0.455
	LAP	1	0.774	0.381
	Bedrock type	2	8.062	0.001
	LAP:Bedrock type	2	0.493	0.612
	AP	1	13.741	0
	Bedrock type	2	5.802	0.004
	AP:Bedrock type	2	0.764	0.469
	CEL	1	0.658	0.42
	Bedrock type	2	7.96	0.001
	CEL:Bedrock type	2	0.05	0.952
	BX	1	5.426	0.022
	Bedrock type	2	7.18	0.001
	BX:Bedrock type	2	0.264	0.769
	POX	1	3.749	0.056
	Bedrock type	2	6.872	0.002
	POX:Bedrock type	2	1.347	0.265
Soil	SOC	1	12.971	0.001
	Bedrock type	2	4.377	0.015
	SOC:Bedrock type	2	0.303	0.739
	TN	1	4.92	0.029
	Bedrock type	2	6.358	0.003
	TN:Bedrock type	2	0.001	0.999
	TP	1	0	0.997
	Bedrock type	2	7.874	0.001
	TP:Bedrock type	2	2.274	0.109
	C:N	1	6.771	0.011
	Bedrock type	2	4.935	0.009
	C:N:Bedrock type	2	5.285	0.007
	C:P	1	6.576	0.012
	Bedrock type	2	6.812	0.002
	C:P:Bedrock type	2	4.007	0.022
	N:P	1	1.852	0.177
	Bedrock type	2	8.742	0
	N:P:Bedrock type	2	2.774	0.068
	NH4+	1	2.205	0.141
	Bedrock type	2	7.428	0.001
	NH4+:Bedrock type	2	0.747	0.477
	NO3-	1	0.12	0.729
	Bedrock type	2	7.206	0.001
	NO3-:Bedrock type	2	0.63	0.535
	TDN	1	2.207	0.141
	Bedrock type	2	7.167	0.001
	TDN:Bedrock type	2	0.719	0.49
	DOC	1	11.683	0.001
	Bedrock type	2	6.33	0.003
	DOC:Bedrock type	2	1.143	0.324
	TOP	1	0.914	0.342
	Bedrock type	2	6.905	0.002
	TOP:Bedrock type	2	1.417	0.248
	WHC	1	4.093	0.046
	Bedrock type	2	5.703	0.005
	WHC:Bedrock type	2	0.201	0.819
	CEC	1	2.231	0.139
	Bedrock type	2	6.432	0.002
	CEC:Bedrock type	2	0.845	0.433
	SMC	1	8.903	0.004
	Bedrock type	2	4.034	0.021
	SMC:Bedrock type	2	0.985	0.378
	Sand content	1	8.791	0.004
	Bedrock type	2	5.313	0.007
	Sand content:Bedrock type	2	0.407	0.667
	Silt content	1	6.177	0.015
	Bedrock type	2	5.901	0.004
	Silt content:Bedrock type	2	0.241	0.787
	Clay content	1	6.424	0.013
	Bedrock type	2	5.793	0.004
	Clay content:Bedrock type	2	1.799	0.172
	Cae	1	3.198	0.077
	Bedrock type	2	6.243	0.003
	Cae:Bedrock type	2	1.02	0.365
	Mge	1	2.458	0.121
	Bedrock type	2	7.048	0.001
	Mge:Bedrock type	2	4.18	0.019
	Fed	1	0.359	0.551
	Bedrock type	2	7.086	0.001
	Fed:Bedrock type	2	0.735	0.483
	Fec	1	0.026	0.872
	Bedrock type	2	7.447	0.001
	Fec:Bedrock type	2	1.371	0.259
	Alo	1	1.609	0.208
	Bedrock type	2	6.66	0.002
	Alo:Bedrock type	2	0.589	0.557
	Feo	1	0.384	0.537
	Bedrock type	2	7.575	0.001
	Feo:Bedrock type	2	0.663	0.518
	Ald	1	3.973	0.049
	Bedrock type	2	5.239	0.007
	Ald:Bedrock type	2	0.305	0.738
