# Supplementary material for: Continental-scale drivers of soil microbial extracellular polymeric substances
Source: Research Square preprint supplement (doi:10.21203/rs.3.rs-6279309/v1), 2025-04-09
Supplement: Supplementary file 6 [file 7e919dffedfd28a12757b8db.xlsx]

## Sheet: Sheet1
Table S3 Effects of climate, plant, soil, and microbial factors on EPS in terms of P and F values of the general linear model. The symbol '+' represents a positive correlation, while '-' represents a negative correlation.
Model: EPS ~ Climate/plant/soil/microbial factors
Type	Variables	Df	F value	P value	Direction of effect
Climate	Latitude	1	0.098	0.755
	Longitude	1	1.701	0.195
	Elevation	1	8.893	0.004	+
	MAT	1	1.018	0.316
	MAP	1	12.322	0.001	+
	PET	1	1.809	0.182
	ADI	1	12.951	0.001	+
Plant	Root biomass	1	8.121	0.005	+
	Root C content	1	0.201	0.655
	Root N content	1	11.471	0.001	+
	Root P content	1	1.364	0.247
	Root C:N	1	9.85	0.002	-
	Root C:P	1	1.364	0.246
	Root N:P	1	0.247	0.62
Microbial	MBC	1	124.9	0	+
	MBN	1	135.26	0	+
	MBP	1	38.635	0	+
	MBC:MBN	1	13.808	0	-
	MBC:MBP	1	0.814	0.369
	MBN:MBP	1	0.016	0.9
	CUE	1	1.109	0.295
	NUE	1	0.244	0.623
	Cgrowth	1	7.133	0.009	+
	qGrowth	1	5.552	0.021	-
	Turnover time	1	3.702	0.058
	VectorL	1	2.703	0.104
	VectorA	1	0.516	0.475
	GPB	1	2.93	0.09
	GNB	1	4.13	0.045	+
	Fungi	1	2.04	0.157
	Bacteria	1	2.902	0.092
	Total PLFA	1	1.861	0.176
	B:F	1	0.203	0.653
	GPB:GNB	1	0.005	0.946
	BG	1	0.297	0.587
	NAG	1	1.07	0.304
	LAP	1	0.063	0.803
	AP	1	4.788	0.031	+
	CEL	1	2.856	0.095
	BX	1	0.525	0.471
	POX	1	0.671	0.415
Soil	SOC	1	46.537	0	+
	TN	1	128.05	0	+
	TP	1	26.834	0	+
	C:N	1	5.043	0.027	-
	C:P	1	0.208	0.65
	N:P	1	2.402	0.125
	NH4+	1	0.43	0.514
	NO3-	1	11.849	0.001	+
	TDN	1	18.839	0	+
	DOC	1	0.208	0.65
	TOP	1	44.7	0	+
	WHC	1	73.766	0	+
	CEC	1	77.617	0	+
	SMC	1	10.298	0.002	+
	Sand content	1	15.138	0	-
	Silt content	1	7.254	0.008	+
	Clay content	1	17.006	0	+
	Cae	1	61.593	0	+
	Mge	1	9.48	0.003	+
	Fed	1	25.431	0	+
	Fec	1	18.255	0	+
	Alo	1	1.363	0.246
	Feo	1	5.419	0.022	+
	Ald	1	4.25	0.042	+
