# Supplementary material for: Continental-scale drivers of soil microbial extracellular polymeric substances
Source: Research Square preprint supplement (doi:10.21203/rs.3.rs-6279309/v1), 2025-04-09
Supplement: Supplementary file 7 [file 9446aacbed04d12d47217c09.xlsx]

## Sheet: Sheet1
Table S7 Effects of climate, plant, soil, microbial factors and land use type on EPS in terms of P and F values of the general linear model.
Model: EPS ~ Climate/plant/soil/microbial factors * Land use type
Type	Variables	Df	F value	P value
Climate	Latitude	1	0.107	0.744
	Land use type	2	2.85	0.063
	Latitude:Land use type	2	3.136	0.048
	Longitude	1	1.856	0.177
	Land use type	2	3	0.055
	Longitude:Land use type	2	3.097	0.05
	Elevation	1	9.392	0.003
	Land use type	2	2.959	0.057
	Elevation:Land use type	2	1.564	0.215
	MAT	1	1.099	0.297
	Land use type	2	3.019	0.054
	MAT:Land use type	2	2.553	0.084
	MAP	1	12.92	0.001
	Land use type	2	2.184	0.119
	MAP:Land use type	2	1.999	0.142
	PET	1	1.934	0.168
	Land use type	2	2.912	0.06
	PET:Land use type	2	2.204	0.117
	ADI	1	13.42	0
	Land use type	2	2.425	0.095
	ADI:Land use type	2	1.205	0.305
Plant	Root biomass	1	8.555	0.004
	Land use type	2	2.254	0.111
	Root biomass:Land use type	2	2.147	0.123
	Root C content	1	0.202	0.655
	Land use type	2	2.081	0.131
	Root C content:Land use type	2	0.107	0.899
	Root N content	1	11.685	0.001
	Land use type	2	1.244	0.294
	Root N content:Land use type	2	1.567	0.215
	Root P content	1	1.343	0.25
	Land use type	2	1.318	0.274
	Root N content:Land use type	2	0.105	0.9
	Root C:N	1	9.832	0.002
	Land use type	2	1.646	0.199
	Root C:N:Land use type	2	0.275	0.76
	Root C:P	1	1.36	0.247
	Land use type	2	1.329	0.271
	Root C:P:Land use type	2	0.54	0.585
	Root N:P	1	0.247	0.621
	Land use type	2	1.217	0.302
	Root N:P:Land use type	2	0.704	0.498
Microbial	MBC	1	129.363	0
	Land use type	2	2.411	0.096
	MBC:Land use type	2	1.198	0.307
	MBN	1	138.738	0
	Land use type	2	1.66	0.196
	MBN:Land use type	2	1.496	0.23
	MBP	1	43.023	0
	Land use type	2	3.838	0.025
	MBP:Land use type	2	3.272	0.043
	MBC:MBN	1	14.025	0
	Land use type	2	2.241	0.112
	MBC:MBN:Land use type	2	0.466	0.629
	MBC:MBP	1	0.919	0.34
	Land use type	2	3.066	0.052
	MBC:MBP:Land use type	2	4.717	0.011
	MBN:MBP	1	0.018	0.893
	Land use type	2	3.039	0.053
	MBN:MBP:Land use type	2	5.235	0.007
	CUE	1	1.168	0.283
	Land use type	2	2.757	0.069
	CUE:Land use type	2	1.66	0.196
	NUE	1	0.252	0.617
	Land use type	2	3.069	0.052
	NUE:Land use type	2	0.394	0.676
	Cgrowth	1	7.335	0.008
	Land use type	2	2.486	0.089
	Cgrowth:Land use type	2	0.79	0.457
	qGrowth	1	5.673	0.019
	Land use type	2	2.22	0.115
	qGrowth:Land use type	2	0.761	0.47
	Turnover time	1	3.829	0.054
	Land use type	2	2.455	0.092
	Turnover time:Land use type	2	1.09	0.341
	VectorL	1	2.821	0.097
	Land use type	2	3.226	0.045
	VectorL:Land use type	2	0.738	0.481
	VectorA	1	0.523	0.471
	Land use type	2	2.6	0.08
	VectorA:Land use type	2	0.061	0.941
	GPB	1	3.064	0.084
	Land use type	2	3.296	0.042
	GPB:Land use type	2	0.75	0.475
	GNB	1	4.496	0.037
	Land use type	2	3.627	0.031
	GNB:Land use type	2	2.356	0.101
	Fungi	1	2.204	0.141
	Land use type	2	3.013	0.054
	Fungi:Land use type	2	2.62	0.079
	Bacteria	1	3.095	0.082
	Land use type	2	3.368	0.039
	Bacteria:Land use type	2	1.625	0.203
	Total PLFA	1	1.998	0.161
	Land use type	2	3.132	0.049
	Total PLFA:Land use type	2	2.176	0.12
	B:F	1	0.211	0.647
	Land use type	2	2.748	0.07
	B:F:Land use type	2	1.067	0.349
	GPB:GNB	1	0.005	0.944
	Land use type	2	2.834	0.064
	GPB:GNB:Land use type	2	2.424	0.095
	BG	1	0.31	0.579
	Land use type	2	2.663	0.075
	BG:Land use type	2	1.323	0.272
	NAG	1	1.123	0.292
	Land use type	2	2.575	0.082
	NAG:Land use type	2	1.691	0.19
	LAP	1	0.064	0.801
	Land use type	2	2.676	0.075
	LAP:Land use type	2	0.119	0.888
	AP	1	5.169	0.025
	Land use type	2	2.433	0.094
	AP:Land use type	2	3.152	0.048
	CEL	1	3.04	0.085
	Land use type	2	2.777	0.068
	CEL:Land use type	2	2.127	0.125
	BX	1	0.545	0.462
	Land use type	2	2.59	0.081
	BX:Land use type	2	1.124	0.33
	POX	1	0.687	0.409
	Land use type	2	2.739	0.07
	POX:Land use type	2	0.362	0.698
Soil	SOC	1	54.88	0
	Land use type	2	7.092	0.001
	SOC:Land use type	2	2.975	0.056
	TN	1	133.059	0
	Land use type	2	1.848	0.164
	TN:Land use type	2	1.914	0.154
	TP	1	29.286	0
	Land use type	2	4.654	0.012
	TP:Land use type	2	1.457	0.239
	C:N	1	5.354	0.023
	Land use type	2	3.028	0.054
	C:N:Land use type	2	1.746	0.181
	C:P	1	0.213	0.646
	Land use type	2	2.974	0.056
	C:P:Land use type	2	0.121	0.886
	N:P	1	2.468	0.12
	Land use type	2	2.937	0.058
	N:P:Land use type	2	0.313	0.732
	NH4+	1	0.46	0.499
	Land use type	2	2.791	0.067
	NH4+:Land use type	2	2.434	0.094
	NO3-	1	12.368	0.001
	Land use type	2	3.117	0.049
	NO3-:Land use type	2	0.854	0.429
	TDN	1	19.222	0
	Land use type	2	1.959	0.147
	TDN:Land use type	2	0.955	0.389
	DOC	1	0.232	0.631
	Land use type	2	3.023	0.054
	DOC:Land use type	2	4.214	0.018
	TOP	1	43.815	0
	Land use type	2	0.906	0.408
	TOP:Land use type	2	0.203	0.816
	WHC	1	75.772	0
	Land use type	2	2.973	0.056
	WHC:Land use type	2	0.25	0.779
	CEC	1	87.25	0
	Land use type	2	7.076	0.001
	CEC:Land use type	2	0.51	0.602
	SMC	1	10.792	0.001
	Land use type	2	3.7	0.029
	SMC:Land use type	3	0.459	0.634
	Sand content	1	15.955	0
	Land use type	2	4.007	0.022
	Sand content:Land use type	2	0.421	0.658
	Silt content	1	7.388	0.008
	Land use type	2	2.712	0.072
	Silt content:Land use type	2	0.121	0.886
	Clay content	1	18.339	0
	Land use type	2	5.42	0.006
	Clay content:Land use type	2	0.107	0.899
	Cae	1	68.921	0
	Land use type	2	6.676	0.002
	Cae:Land use type	2	0.678	0.51
	Mge	1	10.14	0.002
	Land use type	2	4.332	0.016
	Mge:Land use type	2	0.802	0.452
	Fed	1	26.42	0
	Land use type	2	3.368	0.039
	Fed:Land use type	2	0.381	0.684
	Fec	1	19.043	0
	Land use type	2	3.456	0.036
	Fec:Land use type	2	0.486	0.617
	Alo	1	1.477	0.228
	Land use type	2	3.042	0.053
	Alo:Land use type	2	2.738	0.07
	Feo	1	5.505	0.021
	Land use type	2	2.681	0.074
	Feo:Land use type	2	0.027	0.973
	Ald	1	4.342	0.04
	Land use type	2	2.654	0.076
	Ald:Land use type	2	0.314	0.731
