# Supplementary material for: Continental-scale drivers of soil microbial extracellular polymeric substances
Source: Research Square preprint supplement (doi:10.21203/rs.3.rs-6279309/v1), 2025-04-09
Supplement: Supplementary file 8 [file a48345efe15e91d7c8ebaee5.xlsx]

## Sheet: Sheet1
Table S13 Effects of climate, plant, soil, microbial factors and bedrock type on EPS proteins in terms of P and F values of the general linear model.
Model: EPS proteins ~ Climate/plant/soil/microbial factors * Bedrock type
Type	Variables	Df	F value	P value
Climate	Latitude	1	0.642	0.425
	Bedrock type	2	1.345	0.266
	Latitude:Bedrock type	2	5.567	0.005
	Longitude	1	4.718	0.033
	Bedrock type	2	1.666	0.195
	Longitude:Bedrock type	2	0.707	0.496
	Elevation	1	1.564	0.215
	Bedrock type	2	0.391	0.678
	Elevation:Bedrock type	2	0.626	0.537
	MAT	1	2.757	0.1
	Bedrock type	2	2.724	0.071
	MAT:Bedrock type	2	5.013	0.009
	MAP	1	5.031	0.027
	Bedrock type	2	0.998	0.373
	MAP:Bedrock type	2	0.032	0.968
	PET	1	6.908	0.01
	Bedrock type	2	5.139	0.008
	PET:Bedrock type	2	2.017	0.139
	ADI	1	7.426	0.008
	Bedrock type	2	2.779	0.068
	ADI:Bedrock type	2	0.912	0.406
Plant	Root biomass	1	9.427	0.003
	Bedrock type	2	1.992	0.143
	Root biomass:Bedrock type	2	0.873	0.421
	Root C content	1	5.361	0.023
	Bedrock type	2	0.83	0.44
	Root C content:Bedrock type	2	0.263	0.77
	Root N content	1	19.218	0
	Bedrock type	2	0.338	0.714
	Root N content:Bedrock type	2	0.328	0.721
	Root P content	1	1.618	0.208
	Bedrock type	2	0.847	0.433
	Root N content:Bedrock type	2	1.902	0.157
	Root C:N	1	14.174	0
	Bedrock type	2	0.224	0.8
	Root C:N:Bedrock type	2	0.352	0.704
	Root C:P	1	2.888	0.093
	Bedrock type	2	0.835	0.438
	Root C:P:Bedrock type	2	0.295	0.745
	Root N:P	1	0.187	0.667
	Bedrock type	2	0.686	0.507
	Root N:P:Bedrock type	2	0.572	0.567
Microbial	MBC	1	48.226	0
	Bedrock type	2	2.271	0.109
	MBC:Bedrock type	2	0.801	0.452
	MBN	1	42.064	0
	Bedrock type	2	1.741	0.182
	MBN:Bedrock type	2	1.43	0.245
	MBP	1	10.132	0.002
	Bedrock type	2	0.027	0.974
	MBP:Bedrock type	2	1.346	0.266
	MBC:MBN	1	8.651	0.004
	Bedrock type	2	0.001	0.999
	MBC:MBN:Bedrock type	2	0.319	0.728
	MBC:MBP	1	0.067	0.797
	Bedrock type	2	0.46	0.633
	MBC:MBP:Bedrock type	2	0.064	0.938
	MBN:MBP	1	0.959	0.33
	Bedrock type	2	0.708	0.495
	MBN:MBP:Bedrock type	2	0.046	0.956
	CUE	1	0.015	0.902
	Bedrock type	2	0.306	0.737
	CUE:Bedrock type	2	0.775	0.464
	NUE	1	3.108	0.081
	Bedrock type	2	1.108	0.335
	NUE:Bedrock type	2	0.213	0.808
	Cgrowth	1	2.916	0.091
	Bedrock type	2	0.697	0.501
	Cgrowth:Bedrock type	2	5.632	0.005
	qGrowth	1	6.215	0.015
	Bedrock type	2	0.115	0.892
	qGrowth:Bedrock type	2	0.531	0.59
	Turnover time	1	5.652	0.02
	Bedrock type	2	0.266	0.767
	Turnover time:Bedrock type	2	0.228	0.797
	VectorL	1	4.586	0.035
	Bedrock type	2	0.039	0.962
	VectorL:Bedrock type	2	3.919	0.024
	VectorA	1	1.568	0.214
	Bedrock type	2	1.566	0.215
	VectorA:Bedrock type	2	0.058	0.944
	GPB	1	2.645	0.108
	Bedrock type	2	0.44	0.645
	GPB:Bedrock type	2	0.644	0.528
	GNB	1	3.014	0.086
	Bedrock type	2	0.426	0.654
	GNB:Bedrock type	2	0.308	0.736
	Fungi	1	1.086	0.3
	Bedrock type	2	0.283	0.755
	Fungi:Bedrock type	2	0.285	0.753
	Bacteria	1	2.568	0.113
	Bedrock type	2	0.406	0.668
	Bacteria:Bedrock type	2	0.368	0.693
	Total PLFA	1	2.12	0.149
	Bedrock type	2	0.413	0.663
	Total PLFA:Bedrock type	2	0.455	0.636
	B:F	1	0.695	0.407
	Bedrock type	2	0.372	0.691
	B:F:Bedrock type	2	2.537	0.085
	GPB:GNB	1	0	0.999
	Bedrock type	2	0.312	0.733
	GPB:GNB:Bedrock type	2	0.409	0.665
	BG	1	0.049	0.826
	Bedrock type	2	0.311	0.734
	BG:Bedrock type	2	2.477	0.09
	NAG	1	0.023	0.879
	Bedrock type	2	0.48	0.621
	NAG:Bedrock type	2	0.208	0.812
	LAP	1	0.299	0.586
	Bedrock type	2	0.846	0.433
	LAP:Bedrock type	2	4.608	0.013
	AP	1	1.547	0.217
	Bedrock type	2	0.293	0.747
	AP:Bedrock type	2	1.009	0.369
	CEL	1	1.59	0.211
	Bedrock type	2	0.018	0.983
	CEL:Bedrock type	2	2.796	0.067
	BX	1	0.115	0.735
	Bedrock type	2	0.268	0.766
	BX:Bedrock type	2	2.91	0.06
	POX	1	0.344	0.559
	Bedrock type	2	0.404	0.669
	POX:Bedrock type	2	0.064	0.938
Soil	SOC	1	12.878	0.001
	Bedrock type	2	1.173	0.314
	SOC:Bedrock type	2	0.376	0.688
	TN	1	49.911	0
	Bedrock type	2	0.917	0.404
	TN:Bedrock type	2	0.4	0.672
	TP	1	25.261	0
	Bedrock type	2	0.97	0.383
	TP:Bedrock type	2	0.717	0.491
	C:N	1	8.32	0.005
	Bedrock type	2	0.932	0.398
	C:N:Bedrock type	2	0.923	0.401
	C:P	1	1.455	0.231
	Bedrock type	2	0.233	0.793
	C:P:Bedrock type	2	0.239	0.788
	N:P	1	0.006	0.937
	Bedrock type	2	0.302	0.74
	N:P:Bedrock type	2	0.275	0.761
	NH4+	1	2.633	0.108
	Bedrock type	2	0.67	0.515
	NH4+:Bedrock type	2	0.904	0.409
	NO3-	1	17.133	0
	Bedrock type	2	0.361	0.698
	NO3-:Bedrock type	2	0.728	0.486
	TDN	1	19.872	0
	Bedrock type	2	0.218	0.805
	TDN:Bedrock type	2	0.809	0.449
	DOC	1	0.948	0.333
	Bedrock type	2	0.494	0.612
	DOC:Bedrock type	2	0.52	0.596
	TOP	1	34.527	0
	Bedrock type	2	1.682	0.192
	TOP:Bedrock type	2	0.699	0.5
	WHC	1	32.254	0
	Bedrock type	2	2.045	0.136
	WHC:Bedrock type	2	0.361	0.698
	CEC	1	10.736	0.002
	Bedrock type	2	1.62	0.204
	CEC:Bedrock type	2	0.285	0.752
	SMC	1	5.69	0.019
	Bedrock type	2	1.718	0.186
	SMC:Bedrock type	2	1.994	0.142
	Sand content	1	6.858	0.01
	Bedrock type	2	0.122	0.885
	Sand content:Bedrock type	2	1.87	0.16
	Silt content	1	6.467	0.013
	Bedrock type	2	0.116	0.89
	Silt content:Bedrock type	2	2.688	0.074
	Clay content	1	2.756	0.101
	Bedrock type	2	0.032	0.969
	Clay content:Bedrock type	2	0.045	0.956
	Cae	1	10.095	0.002
	Bedrock type	2	1.877	0.159
	Cae:Bedrock type	2	0.221	0.802
	Mge	1	4.024	0.048
	Bedrock type	2	0.078	0.925
	Mge:Bedrock type	2	1.139	0.325
	Fed	1	8.157	0.005
	Bedrock type	2	0.187	0.83
	Fed:Bedrock type	2	0.961	0.387
	Fec	1	2.624	0.109
	Bedrock type	2	0.021	0.979
	Fec:Bedrock type	2	2.577	0.082
	Alo	1	3.068	0.083
	Bedrock type	2	1.229	0.298
	Alo:Bedrock type	2	3.005	0.055
	Feo	1	15.809	0
	Bedrock type	2	6.478	0.002
	Feo:Bedrock type	2	2.937	0.058
	Ald	1	5.133	0.026
	Bedrock type	2	1.841	0.165
	Ald:Bedrock type	2	2.13	0.125
