# Supplementary material for: Continental-scale drivers of soil microbial extracellular polymeric substances
Source: Research Square preprint supplement (doi:10.21203/rs.3.rs-6279309/v1), 2025-04-09
Supplement: Supplementary file 9 [file accea1c03cd361dce7ac8c75.xlsx]

## Sheet: Sheet1
Table S6 Effects of climate, plant, soil, and microbial factors on EPS production efficiency in terms of P and F values of the general linear model. The symbol '+' represents a positive correlation, while '-' represents a negative correlation.
Model: EPS/MBC ~ Climate/plant/soil/microbial factors
Type	Variables	Df	F value	P value	Direction of effect
Climate	Latitude	1	1.381	0.243
	Longitude	1	3.785	0.055
	Elevation	1	4.878	0.03	-
	MAT	1	1.548	0.217
	MAP	1	9.094	0.003	-
	PET	1	0.273	0.603
	ADI	1	11.062	0.001	-
Plant	Root biomass	1	4.554	0.036	-
	Root C content	1	0.128	0.722
	Root N content	1	0.037	0.847
	Root P content	1	0.373	0.543
	Root C:N	1	0.333	0.566
	Root C:P	1	0.058	0.81
	Root N:P	1	0.005	0.943
Microbial	MBC	1	14.547	0	-
	MBN	1	7.259	0.008	-
	MBP	1	5.733	0.019	-
	MBC:MBN	1	3.304	0.072
	MBC:MBP	1	0.147	0.702
	MBN:MBP	1	1.034	0.312
	CUE	1	12.87	0.001	-
	NUE	1	0.109	0.743
	Cgrowth	1	16.504	0	-
	qGrowth	1	4.742	0.032	-
	Turnover time	1	0.975	0.326
	VectorL	1	4.145	0.045	+
	VectorA	1	0.245	0.622
	GPB	1	0.631	0.429
	GNB	1	0.551	0.46
	Fungi	1	0.004	0.949
	Bacteria	1	0.416	0.521
	Total PLFA	1	0.018	0.894
	B:F	1	0.143	0.706
	GPB:GNB	1	0.307	0.581
	BG	1	1.033	0.312
	NAG	1	1.939	0.167
	LAP	1	0.676	0.413
	AP	1	12.475	0.001	-
	CEL	1	0.58	0.448
	BX	1	4.841	0.03	-
	POX	1	3.294	0.073
Soil	SOC	1	12.242	0.001	-
	TN	1	4.486	0.037	-
	TP	1	0	0.997
	C:N	1	5.726	0.019	-
	C:P	1	5.499	0.021	-
	N:P	1	1.529	0.22
	NH4+	1	1.939	0.167
	NO3-	1	0.107	0.745
	TDN	1	1.952	0.166
	DOC	1	10.416	0.002	-
	TOP	1	0.801	0.373
	WHC	1	3.766	0.055
	CEC	1	1.997	0.161
	SMC	1	8.343	0.005	-
	Sand content	1	8.12	0.005	-
	Silt content	1	5.657	0.02	+
	Clay content	1	5.714	0.019	+
	Cae	1	2.863	0.094
	Mge	1	2.04	0.157
	Fed	1	0.318	0.574
	Fec	1	0.023	0.88
	Alo	1	1.441	0.233
	Feo	1	0.337	0.563
	Ald	1	3.683	0.058
