# Supplementary material for: Continental-scale drivers of soil microbial extracellular polymeric substances
Source: Research Square preprint supplement (doi:10.21203/rs.3.rs-6279309/v1), 2025-04-09
Supplement: Supplementary file 10 [file b00092fbe26bac1ee551df2f.xlsx]

## Sheet: Sheet1
Table S8 Effects of climate, plant, soil, microbial factors and land use type on EPS polysaccharides in terms of P and F values of the general linear model.
Model: EPS polysaccharides ~ Climate/plant/soil/microbial factors * Land use type
Type	Variables	Df	F value	P value
Climate	Latitude	1	0.564	0.455
	Land use type	2	1.101	0.337
	Latitude:Land use type	2	1.758	0.179
	Longitude	1	0.541	0.464
	Land use type	2	1.102	0.337
	Longitude:Land use type	2	3.097	0.05
	Elevation	1	11.217	0.001
	Land use type	2	1.042	0.357
	Elevation:Land use type	2	3.072	0.051
	MAT	1	0.362	0.549
	Land use type	2	1.043	0.357
	MAT:Land use type	2	1.166	0.317
	MAP	1	12.225	0.001
	Land use type	2	0.595	0.554
	MAP:Land use type	2	2.608	0.079
	PET	1	0.406	0.526
	Land use type	2	1.029	0.362
	PET:Land use type	2	1.324	0.272
	ADI	1	11.521	0.001
	Land use type	2	0.697	0.501
	ADI:Land use type	2	2.109	0.128
Plant	Root biomass	1	5.405	0.022
	Land use type	2	0.637	0.531
	Root biomass:Land use type	2	3.435	0.037
	Root C content	1	0.183	0.67
	Land use type	2	0.912	0.406
	Root C content:Land use type	2	0.082	0.921
	Root N content	1	5.66	0.02
	Land use type	2	0.675	0.512
	Root N content:Land use type	2	1.726	0.184
	Root P content	1	0.838	0.363
	Land use type	2	0.23	0.795
	Root N content:Land use type	2	0.088	0.916
	Root C:N	1	5.226	0.025
	Land use type	2	0.935	0.397
	Root C:N:Land use type	2	0.295	0.746
	Root C:P	1	0.53	0.469
	Land use type	2	0.262	0.77
	Root C:P:Land use type	2	0.387	0.681
	Root N:P	1	0.19	0.664
	Land use type	2	0.201	0.818
	Root N:P:Land use type	2	0.577	0.564
Microbial	MBC	1	95.652	0
	Land use type	2	0.92	0.402
	MBC:Land use type	2	1.245	0.293
	MBN	1	111.582	0
	Land use type	2	0.285	0.752
	MBN:Land use type	2	1.385	0.256
	MBP	1	42.963	0
	Land use type	2	1.239	0.295
	MBP:Land use type	2	2.57	0.082
	MBC:MBN	1	11.106	0.001
	Land use type	2	0.917	0.403
	MBC:MBN:Land use type	2	0.388	0.679
	MBC:MBP	1	1.76	0.188
	Land use type	2	1.146	0.323
	MBC:MBP:Land use type	2	3.939	0.023
	MBN:MBP	1	0.402	0.528
	Land use type	2	1.175	0.314
	MBN:MBP:Land use type	2	5.135	0.008
	CUE	1	1.711	0.194
	Land use type	2	0.982	0.379
	CUE:Land use type	2	1.511	0.227
	NUE	1	2.057	0.155
	Land use type	2	1.649	0.198
	NUE:Land use type	2	0.537	0.586
	Cgrowth	1	7.096	0.009
	Land use type	2	0.748	0.476
	Cgrowth:Land use type	2	0.538	0.586
	qGrowth	1	3.525	0.064
	Land use type	2	0.879	0.419
	qGrowth:Land use type	2	1.028	0.362
	Turnover time	1	1.939	0.167
	Land use type	2	0.958	0.388
	Turnover time:Land use type	2	1.298	0.278
	VectorL	1	1.382	0.243
	Land use type	2	1.51	0.227
	VectorL:Land use type	2	0.595	0.554
	VectorA	1	2.199	0.142
	Land use type	2	1.002	0.371
	VectorA:Land use type	2	0.207	0.813
	GPB	1	2.139	0.147
	Land use type	2	1.177	0.313
	GPB:Land use type	2	1.187	0.31
	GNB	1	3.486	0.065
	Land use type	2	1.339	0.268
	GNB:Land use type	2	3.518	0.034
	Fungi	1	1.923	0.169
	Land use type	2	1.093	0.34
	Fungi:Land use type	2	2.909	0.06
	Bacteria	1	2.191	0.143
	Land use type	2	1.217	0.301
	Bacteria:Land use type	2	2.382	0.098
	Total PLFA	1	1.244	0.268
	Land use type	2	1.128	0.328
	Total PLFA:Land use type	2	2.99	0.056
	B:F	1	0.044	0.834
	Land use type	2	1.033	0.36
	B:F:Land use type	2	0.642	0.529
	GPB:GNB	1	0.008	0.93
	Land use type	2	1.075	0.346
	GPB:GNB:Land use type	2	2.34	0.103
	BG	1	0.37	0.545
	Land use type	2	1.028	0.362
	BG:Land use type	2	1.816	0.169
	NAG	1	2.014	0.16
	Land use type	2	0.891	0.414
	NAG:Land use type	2	1.976	0.145
	LAP	1	0.305	0.582
	Land use type	2	0.933	0.398
	LAP:Land use type	2	0.134	0.875
	AP	1	5.281	0.024
	Land use type	2	0.737	0.481
	AP:Land use type	2	3.482	0.035
	CEL	1	2.661	0.107
	Land use type	2	1.221	0.3
	CEL:Land use type	2	2.236	0.113
	BX	1	0.614	0.436
	Land use type	2	0.955	0.389
	BX:Land use type	2	1.31	0.275
	POX	1	0.611	0.437
	Land use type	2	1.007	0.37
	POX:Land use type	2	0.653	0.523
Soil	SOC	1	52.693	0
	Land use type	2	3.545	0.033
	SOC:Land use type	2	2.53	0.086
	TN	1	95.002	0
	Land use type	2	0.157	0.855
	TN:Land use type	2	2.015	0.14
	TP	1	18.641	0
	Land use type	2	2.799	0.066
	TP:Land use type	2	1.523	0.224
	C:N	1	2.666	0.106
	Land use type	2	1.719	0.185
	C:N:Land use type	2	2.561	0.083
	C:P	1	1.28	0.261
	Land use type	2	1.335	0.269
	C:P:Land use type	2	0.166	0.847
	N:P	1	3.828	0.054
	Land use type	2	1.114	0.333
	N:P:Land use type	2	0.266	0.767
	NH4+	1	0.015	0.903
	Land use type	2	1.07	0.347
	NH4+:Land use type	2	2.222	0.115
	NO3-	1	6.435	0.013
	Land use type	2	1.511	0.227
	NO3-:Land use type	2	0.712	0.493
	TDN	1	11.957	0.001
	Land use type	2	0.823	0.443
	TDN:Land use type	2	1.163	0.317
	DOC	1	1.136	0.289
	Land use type	2	1.15	0.321
	DOC:Land use type	2	4.135	0.019
	TOP	1	30.145	0
	Land use type	2	0.496	0.611
	TOP:Land use type	2	0.491	0.614
	WHC	1	59.31	0
	Land use type	2	0.839	0.436
	WHC:Land use type	2	0.478	0.622
	CEC	1	109.787	0
	Land use type	2	5.501	0.006
	CEC:Land use type	2	0.17	0.844
	SMC	1	9.186	0.003
	Land use type	2	1.347	0.266
	SMC:Land use type	2	0.61	0.546
	Sand content	1	14.527	0
	Land use type	2	2.441	0.093
	Sand content:Land use type	2	0.807	0.45
	Silt content	1	5.239	0.025
	Land use type	2	1.214	0.302
	Silt content:Land use type	2	0.219	0.804
	Clay content	1	21.866	0
	Land use type	2	3.942	0.023
	Clay content:Land use type	2	0.33	0.72
	Cae	1	83.681	0
	Land use type	2	5.808	0.004
	Cae:Land use type	2	0.651	0.524
	Mge	1	9.365	0.003
	Land use type	2	2.386	0.098
	Mge:Land use type	2	0.848	0.432
	Fed	1	25.641	0
	Land use type	2	1.142	0.324
	Fed:Land use type	2	0.363	0.697
	Fec	1	23.054	0
	Land use type	2	1.31	0.275
	Fec:Land use type	2	0.396	0.674
	Alo	1	0.554	0.459
	Land use type	2	1.061	0.351
	Alo:Land use type	2	1.743	0.181
	Feo	1	1.888	0.173
	Land use type	2	0.994	0.374
	Feo:Land use type	2	0.464	0.631
	Ald	1	2.645	0.108
	Land use type	2	0.88	0.419
	Ald:Land use type	2	0.041	0.96
