# Supplementary material for: Continental-scale drivers of soil microbial extracellular polymeric substances
Source: Research Square preprint supplement (doi:10.21203/rs.3.rs-6279309/v1), 2025-04-09
Supplement: Supplementary file 11 [file c17b860284812e8aefae4912.xlsx]

## Sheet: Sheet1
Table S4 Effects of climate, plant, soil, and microbial factors on EPS polysaccharides in terms of P and F values of the general linear model.
Model: EPS polysaccharides ~ Climate/plant/soil/microbial factors
Type	Variables	Df	F value	P value
Climate	Latitude	1	0.554	0.459
	Longitude	1	0.516	0.475
	Elevation	1	10.714	0.002
	MAT	1	0.36	0.55
	MAP	1	11.907	0.001
	PET	1	0.403	0.527
	ADI	1	11.318	0.001
Plant	Root biomass	1	5.167	0.025
	Root C content	1	0.188	0.666
	Root N content	1	5.608	0.02
	Root P content	1	0.877	0.352
	Root C:N	1	5.321	0.023
	Root C:P	1	0.549	0.461
	Root N:P	1	0.197	0.659
Microbial	MBC	1	95.303	0
	MBN	1	112.41	0
	MBP	1	41.303	0
	MBC:MBN	1	11.28	0.001
	MBC:MBP	1	1.647	0.203
	MBN:MBP	1	0.367	0.546
	CUE	1	1.693	0.197
	NUE	1	2.049	0.156
	Cgrowth	1	7.21	0.009
	qGrowth	1	3.532	0.063
	Turnover time	1	1.928	0.168
	VectorL	1	1.378	0.244
	VectorA	1	2.238	0.138
	GPB	1	2.122	0.149
	GNB	1	3.277	0.074
	Fungi	1	1.842	0.178
	Bacteria	1	2.115	0.149
	Total PLFA	1	1.188	0.279
	B:F	1	0.044	0.834
	GPB:GNB	1	0.008	0.931
	BG	1	0.363	0.548
	NAG	1	1.976	0.163
	LAP	1	0.311	0.578
	AP	1	5.033	0.027
	CEL	1	2.577	0.112
	BX	1	0.61	0.437
	POX	1	0.615	0.435
Soil	SOC	1	48.318	0
	TN	1	94.642	0
	TP	1	17.726	0
	C:N	1	2.537	0.115
	C:P	1	1.295	0.258
	N:P	1	3.882	0.052
	NH4+	1	0.015	0.904
	NO3-	1	6.403	0.013
	TDN	1	11.96	0.001
	DOC	1	1.059	0.306
	TOP	1	30.84	0
	WHC	1	60.225	0
	CEC	1	101.51	0
	SMC	1	9.195	0.003
	Sand content	1	14.135	0
	Silt content	1	5.306	0.024
	Clay content	1	20.814	0
	Cae	1	76.137	0
	Mge	1	9.115	0.003
	Fed	1	25.926	0
	Fec	1	23.205	0
	Alo	1	0.545	0.463
	Feo	1	1.911	0.17
	Ald	1	2.71	0.103
