# Supplementary material for: Continental-scale drivers of soil microbial extracellular polymeric substances
Source: Research Square preprint supplement (doi:10.21203/rs.3.rs-6279309/v1), 2025-04-09
Supplement: Supplementary file 12 [file cb66eb245a425feb13f24ddc.xlsx]

## Sheet: Sheet1
Table S11 Effects of climate, plant, soil, microbial factors and bedrock type on EPS in terms of P and F values of the general linear model.
Model: EPS ~ Climate/plant/soil/microbial factors * Bedrock type
Type	Variables	Df	F value	P value
Climate	Latitude	1	0.135	0.715
	Bedrock type	2	9.113	0
	Latitude:Bedrock type	2	9.585	0
	Longitude	1	2.219	0.14
	Bedrock type	2	12.073	0
	Longitude:Bedrock type	2	3.633	0.031
	Elevation	1	10.255	0.002
	Bedrock type	2	7.554	0.001
	Elevation:Bedrock type	2	1.337	0.268
	MAT	1	1.617	0.207
	Bedrock type	2	16.112	0
	MAT:Bedrock type	2	12.323	0
	MAP	1	14.936	0
	Bedrock type	2	10.496	0
	MAP:Bedrock type	2	1.05	0.354
	PET	1	2.725	0.102
	Bedrock type	2	19.46	0
	PET:Bedrock type	2	5.342	0.007
	ADI	1	18.713	0
	Bedrock type	2	18.75	0
	ADI:Bedrock type	2	3.269	0.043
Plant	Root biomass	1	10.827	0.001
	Bedrock type	2	13.04	0
	Root biomass:Bedrock type	2	3.952	0.023
	Root C content	1	0.228	0.634
	Bedrock type	2	7.716	0.001
	Root C content:Bedrock type	2	0.124	0.883
	Root N content	1	13.324	0
	Bedrock type	2	7.748	0.001
	Root N content:Bedrock type	2	1.276	0.285
	Root P content	1	1.669	0.201
	Bedrock type	2	8.242	0.001
	Root N content:Bedrock type	2	2.238	0.114
	Root C:N	1	11.378	0.001
	Bedrock type	2	7.103	0.001
	Root C:N:Bedrock type	2	1.644	0.199
	Root C:P	1	1.593	0.211
	Bedrock type	2	8.069	0.001
	Root C:P:Bedrock type	2	0.482	0.619
	Root N:P	1	0.286	0.594
	Bedrock type	2	7.671	0.001
	Root N:P:Bedrock type	2	0.364	0.696
Microbial	MBC	1	148.526	0
	Bedrock type	2	9.168	0
	MBC:Bedrock type	2	1.346	0.266
	MBN	1	143.186	0
	Bedrock type	2	3.588	0.032
	MBN:Bedrock type	2	1.048	0.355
	MBP	1	43.201	0
	Bedrock type	2	3.262	0.043
	MBP:Bedrock type	2	4.056	0.021
	MBC:MBN	1	14.693	0
	Bedrock type	2	4.275	0.017
	MBC:MBN:Bedrock type	2	0.61	0.545
	MBC:MBP	1	0.907	0.344
	Bedrock type	2	6.196	0.003
	MBC:MBP:Bedrock type	2	0.905	0.408
	MBN:MBP	1	0.018	0.894
	Bedrock type	2	7.08	0.001
	MBN:MBP:Bedrock type	2	0.41	0.665
	CUE	1	1.229	0.271
	Bedrock type	2	6.292	0.003
	CUE:Bedrock type	2	0.569	0.568
	NUE	1	0.271	0.604
	Bedrock type	2	6.681	0.002
	NUE:Bedrock type	2	0.229	0.796
	Cgrowth	1	9.451	0.003
	Bedrock type	2	9.506	0
	Cgrowth:Bedrock type	2	7.118	0.001
	qGrowth	1	6.044	0.016
	Bedrock type	2	5.646	0.005
	qGrowth:Bedrock type	2	0.337	0.715
	Turnover time	1	4.144	0.045
	Bedrock type	2	6.696	0.002
	Turnover time:Bedrock type	2	0.688	0.505
	VectorL	1	3	0.087
	Bedrock type	2	5.545	0.005
	VectorL:Bedrock type	2	1.404	0.251
	VectorA	1	0.581	0.448
	Bedrock type	2	7.345	0.001
	VectorA:Bedrock type	2	0.322	0.726
	GPB	1	3.295	0.073
	Bedrock type	2	7.077	0.001
	GPB:Bedrock type	2	0.518	0.598
	GNB	1	4.631	0.034
	Bedrock type	2	7.032	0.001
	GNB:Bedrock type	2	0.426	0.655
	Fungi	1	2.259	0.137
	Bedrock type	2	6.515	0.002
	Fungi:Bedrock type	2	0.33	0.72
	Bacteria	1	3.247	0.075
	Bedrock type	2	6.916	0.002
	Bacteria:Bedrock type	2	0.428	0.653
	Total PLFA	1	2.126	0.148
	Bedrock type	2	7.135	0.001
	Total PLFA:Bedrock type	2	1.284	0.282
	B:F	1	0.227	0.635
	Bedrock type	2	6.633	0.002
	B:F:Bedrock type	2	0.601	0.55
	GPB:GNB	1	0.005	0.942
	Bedrock type	2	6.779	0.002
	GPB:GNB:Bedrock type	2	1.246	0.293
	BG	1	0.367	0.546
	Bedrock type	2	7.967	0.001
	BG:Bedrock type	2	4.537	0.013
	NAG	1	1.201	0.276
	Bedrock type	2	6.383	0.003
	NAG:Bedrock type	2	1.155	0.32
	LAP	1	0.078	0.781
	Bedrock type	2	9.253	0
	LAP:Bedrock type	2	3.412	0.038
	AP	1	6.093	0.016
	Bedrock type	2	7.047	0.001
	AP:Bedrock type	2	7.226	0.001
	CEL	1	3.129	0.08
	Bedrock type	2	5.094	0.008
	CEL:Bedrock type	2	1.217	0.301
	BX	1	0.695	0.407
	Bedrock type	2	7.763	0.001
	BX:Bedrock type	2	8.737	0
	POX	1	0.77	0.383
	Bedrock type	2	7.519	0.001
	POX:Bedrock type	2	1.134	0.327
Soil	SOC	1	58.737	0
	Bedrock type	2	12.836	0
	SOC:Bedrock type	2	0.961	0.387
	TN	1	150.747	0
	Bedrock type	2	9.482	0
	TN:Bedrock type	2	0.496	0.611
	TP	1	33.067	0
	Bedrock type	2	8.894	0
	TP:Bedrock type	2	3.557	0.033
	C:N	1	5.493	0.021
	Bedrock type	2	5.881	0.004
	C:N:Bedrock type	2	0.128	0.88
	C:P	1	0.231	0.632
	Bedrock type	2	6.703	0.002
	C:P:Bedrock type	2	0.229	0.796
	N:P	1	2.691	0.105
	Bedrock type	2	6.577	0.002
	N:P:Bedrock type	2	0.849	0.432
	NH4+	1	0.501	0.481
	Bedrock type	2	7.791	0.001
	NH4+:Bedrock type	2	1.691	0.19
	NO3-	1	14.09	0
	Bedrock type	2	7.68	0.001
	NO3-:Bedrock type	2	2.83	0.065
	TDN	1	20.972	0
	Bedrock type	2	6.68	0.002
	TDN:Bedrock type	2	0.414	0.662
	DOC	1	0.244	0.623
	Bedrock type	2	6.847	0.002
	DOC:Bedrock type	2	3.033	0.053
	TOP	1	54.21	0
	Bedrock type	2	11.089	0
	TOP:Bedrock type	2	0.484	0.618
	WHC	1	86.158	0
	Bedrock type	2	9.073	0
	WHC:Bedrock type	2	0.487	0.616
	CEC	1	81.463	0
	Bedrock type	2	3.031	0.053
	CEC:Bedrock type	2	1.2	0.306
	SMC	1	14.093	0
	Bedrock type	2	13.953	0
	SMC:Bedrock type	2	4.63	0.012
	Sand content	1	16.971	0
	Bedrock type	2	4.173	0.019
	Sand content:Bedrock type	2	3.276	0.043
	Silt content	1	8.58	0.004
	Bedrock type	2	6.004	0.004
	Silt content:Bedrock type	2	4.224	0.018
	Clay content	1	17.324	0
	Bedrock type	2	2.771	0.068
	Clay content:Bedrock type	2	0.068	0.934
	Cae	1	63.935	0
	Bedrock type	2	2.888	0.061
	Cae:Bedrock type	2	0.823	0.443
	Mge	1	10.566	0.002
	Bedrock type	2	5.19	0.007
	Mge:Bedrock type	2	1.966	0.146
	Fed	1	29.316	0
	Bedrock type	2	5.377	0.006
	Fed:Bedrock type	2	3.497	0.035
	Fec	1	20.691	0
	Bedrock type	2	2.866	0.062
	Fec:Bedrock type	2	5.137	0.008
	Alo	1	1.742	0.19
	Bedrock type	2	8.71	0
	Alo:Bedrock type	2	5.79	0.004
	Feo	1	8.035	0.006
	Bedrock type	2	20.727	0
	Feo:Bedrock type	2	2.99	0.056
	Ald	1	5.551	0.021
	Bedrock type	2	11.463	0
	Ald:Bedrock type	2	4.311	0.016
