# Supplementary material for: Continental-scale drivers of soil microbial extracellular polymeric substances
Source: Research Square preprint supplement (doi:10.21203/rs.3.rs-6279309/v1), 2025-04-09
Supplement: Supplementary file 13 [file d5ac66efad230b65392fbf44.xlsx]

## Sheet: Sheet1
Table S9 Effects of climate, plant, soil, microbial factors and land use type on EPS proteins in terms of P and F values of the general linear model.
Model: EPS proteins ~ Climate/plant/soil/microbial factors * Land use type
Type	Variables	Df	F value	P value
Climate	Latitude	1	0.732	0.395
	Land use type	2	8.215	0.001
	Latitude:Land use type	2	5.731	0.005
	Longitude	1	5.461	0.022
	Land use type	2	7.845	0.001
	Longitude:Land use type	2	1.669	0.194
	Elevation	1	1.778	0.186
	Land use type	2	6.944	0.002
	Elevation:Land use type	2	0.095	0.91
	MAT	1	3.198	0.077
	Land use type	2	9.095	0
	MAT:Land use type	2	6.745	0.002
	MAP	1	5.669	0.019
	Land use type	2	6.28	0.003
	MAP:Land use type	2	0.338	0.714
	PET	1	7.719	0.007
	Land use type	2	8.704	0
	PET:Land use type	2	4.346	0.016
	ADI	1	7.905	0.006
	Land use type	2	6.674	0.002
	ADI:Land use type	2	0.027	0.973
Plant	Root biomass	1	10.215	0.002
	Land use type	2	6.601	0.002
	Root biomass:Land use type	2	0.1	0.905
	Root C content	1	5.882	0.017
	Land use type	2	4.478	0.014
	Root C content:Land use type	2	0.76	0.471
	Root N content	1	5.882	0.017
	Land use type	2	4.478	0.014
	Root N content:Land use type	2	0.76	0.471
	Root P content	1	1.772	0.187
	Land use type	2	5.588	0.006
	Root N content:Land use type	2	0.856	0.429
	Root C:N	1	15.602	0
	Land use type	2	3.469	0.036
	Root C:N:Land use type	2	1.347	0.266
	Root C:P	1	3.255	0.075
	Land use type	2	5.306	0.007
	Root C:P:Land use type	2	0.674	0.513
	Root N:P	1	0.21	0.648
	Land use type	2	5.2	0.008
	Root N:P:Land use type	2	0.673	0.513
Microbial	MBC	1	52.098	0
	Land use type	2	6.045	0.003
	MBC:Land use type	2	0.727	0.486
	MBN	1	44.704	0
	Land use type	2	5.676	0.005
	MBN:Land use type	2	0.393	0.677
	MBP	1	12.134	0.001
	Land use type	2	7.917	0.001
	MBP:Land use type	2	2.225	0.114
	MBC:MBN	1	9.822	0.002
	Land use type	2	5.867	0.004
	MBC:MBN:Land use type	2	0.315	0.731
	MBC:MBP	1	0.085	0.772
	Land use type	2	7.493	0.001
	MBC:MBP:Land use type	2	4.923	0.009
	MBN:MBP	1	1.179	0.281
	Land use type	2	7.075	0.001
	MBN:MBP:Land use type	2	3.717	0.028
	CUE	1	0.017	0.895
	Land use type	2	6.893	0.002
	CUE:Land use type	2	0.874	0.421
	NUE	1	3.45	0.067
	Land use type	2	6.056	0.003
	NUE:Land use type	2	0.132	0.876
	Cgrowth	1	3.075	0.083
	Land use type	2	6.983	0.002
	Cgrowth:Land use type	2	2.05	0.135
	qGrowth	1	6.942	0.01
	Land use type	2	5.711	0.005
	qGrowth:Land use type	2	0.039	0.962
	Turnover time	1	6.413	0.013
	Land use type	2	6.155	0.003
	Turnover time:Land use type	2	0.195	0.823
	VectorL	1	4.922	0.029
	Land use type	2	6.86	0.002
	VectorL:Land use type	2	0.544	0.583
	VectorA	1	1.815	0.182
	Land use type	2	7.691	0.001
	VectorA:Land use type	2	0.954	0.389
	GPB	1	3.182	0.078
	Land use type	2	8.586	0
	GPB:Land use type	2	1.438	0.243
	GNB	1	3.596	0.061
	Land use type	2	8.607	0
	GNB:Land use type	2	0.577	0.564
	Fungi	1	1.268	0.263
	Land use type	2	7.264	0.001
	Fungi:Land use type	2	0.619	0.541
	Bacteria	1	3.089	0.082
	Land use type	2	8.508	0
	Bacteria:Land use type	2	1.14	0.325
	Total PLFA	1	2.504	0.117
	Land use type	2	7.987	0.001
	Total PLFA:Land use type	2	0.815	0.446
	B:F	1	0.78	0.38
	Land use type	2	7.085	0.001
	B:F:Land use type	2	1.443	0.242
	GPB:GNB	1	0	0.999
	Land use type	2	7.145	0.001
	GPB:GNB:Land use type	2	2.058	0.134
	BG	1	0.053	0.818
	Land use type	2	6.786	0.002
	BG:Land use type	2	0.068	0.934
	NAG	1	0.027	0.87
	Land use type	2	6.968	0.002
	NAG:Land use type	2	0.33	0.72
	LAP	1	0.313	0.577
	Land use type	2	7.729	0.001
	LAP:Land use type	2	0.045	0.957
	AP	1	1.761	0.188
	Land use type	2	6.581	0.002
	AP:Land use type	2	0.86	0.427
	CEL	1	1.742	0.19
	Land use type	2	6.516	0.002
	CEL:Land use type	2	0.668	0.516
	BX	1	0.125	0.725
	Land use type	2	6.737	0.002
	BX:Land use type	2	0.23	0.795
	POX	1	0.395	0.531
	Land use type	2	6.924	0.002
	POX:Land use type	2	0.018	0.982
Soil	SOC	1	15.767	0
	Land use type	2	9.7	0
	SOC:Land use type	2	1.842	0.165
	TN	1	57.133	0
	Land use type	2	6.477	0.002
	TN:Land use type	2	1.252	0.291
	TP	1	28.621	0
	Land use type	2	7.205	0.001
	TP:Land use type	2	0.426	0.655
	C:N	1	8.978	0.004
	Land use type	2	5.375	0.006
	C:N:Land use type	2	0.025	0.975
	C:P	1	1.647	0.203
	Land use type	2	6.169	0.003
	C:P:Land use type	2	0.04	0.961
	N:P	1	0.007	0.933
	Land use type	2	6.839	0.002
	N:P:Land use type	2	0.206	0.814
	NH4+	1	3.063	0.084
	Land use type	2	7.576	0.001
	NH4+:Land use type	2	1.277	0.284
	NO3-	1	19.658	0
	Land use type	2	6.629	0.002
	NO3-:Land use type	2	0.958	0.388
	TDN	1	21.837	0
	Land use type	2	5.201	0.007
	TDN:Land use type	2	0.18	0.835
	DOC	1	1.109	0.295
	Land use type	2	6.767	0.002
	DOC:Land use type	2	1.703	0.188
	TOP	1	35.555	0
	Land use type	2	3.592	0.032
	TOP:Land use type	2	0.141	0.869
	WHC	1	36.014	0
	Land use type	2	7.317	0.001
	WHC:Land use type	2	0.382	0.684
	CEC	1	12.404	0.001
	Land use type	2	7.479	0.001
	CEC:Land use type	2	1.408	0.25
	SMC	1	6.404	0.013
	Land use type	2	8.628	0
	SMC:Land use type	2	0.938	0.395
	Sand content	1	7.61	0.007
	Land use type	2	6.88	0.002
	Sand content:Land use type	2	0.043	0.958
	Silt content	1	6.991	0.01
	Land use type	2	6.358	0.003
	Silt content:Land use type	2	0.159	0.853
	Clay content	1	3.238	0.075
	Land use type	2	7.318	0.001
	Clay content:Land use type	2	0.294	0.746
	Cae	1	11.54	0.001
	Land use type	2	7.054	0.001
	Cae:Land use type	2	1.498	0.229
	Mge	1	4.635	0.034
	Land use type	2	7.647	0.001
	Mge:Land use type	2	0.283	0.754
	Fed	1	9.522	0.003
	Land use type	2	7.647	0.001
	Fed:Land use type	2	0.89	0.414
	Fec	1	2.938	0.09
	Land use type	2	7.286	0.001
	Fec:Land use type	2	0.768	0.467
	Alo	1	3.719	0.057
	Land use type	2	8.808	0
	Alo:Land use type	2	5.46	0.006
	Feo	1	15.841	0
	Land use type	2	7.774	0.001
	Feo:Land use type	2	1.748	0.18
	Ald	1	6.094	0.016
	Land use type	2	8.016	0.001
	Ald:Land use type	2	4.747	0.011
